# Supplementary material for: Comparing human papillomavirus prevalences in women with normal cytology or invasive cervical cancer to rank genotypes according to their oncogenic potential: a meta-analysis of observational studies
Source: PubMed Central journal article supplement (PMC3751808; doi:10.1186/1471-2334-13-373), 2013-08-13

**Additional File 2. Meta-analyses assessing the relative oncogenic potential of each human papillomavirus (HPV) genotype (forest plots).** Studies are listed in alphabetical order. Each study is represented by a black cross, which corresponds to the odds ratio (OR) point estimate; a grey square, whose area reflects the weight each study contributes in the meta-analysis; and a horizontal line, which spans the 95% confidence interval (CI). The diamond at the bottom of the graph represents the combined OR and its 95% CI. The solid vertical line is an oncogenic potential equal to that of HPV-16 (OR 1.0) and the dotted vertical line indicates the value of the combined ORs from the random-effects model. The graphs were generated by Stata command metan.

(a)

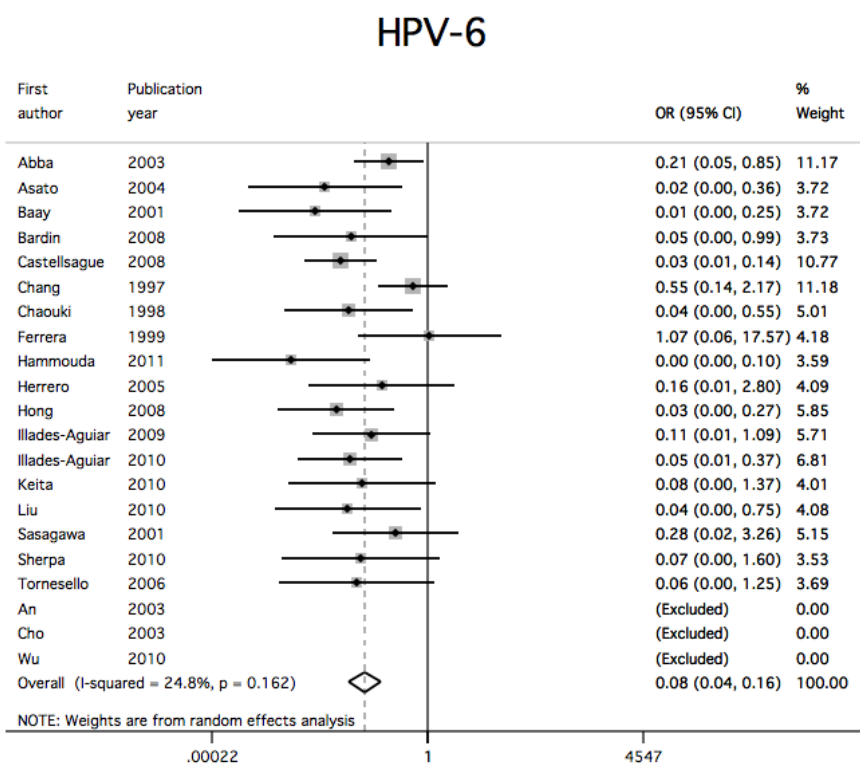

(b)

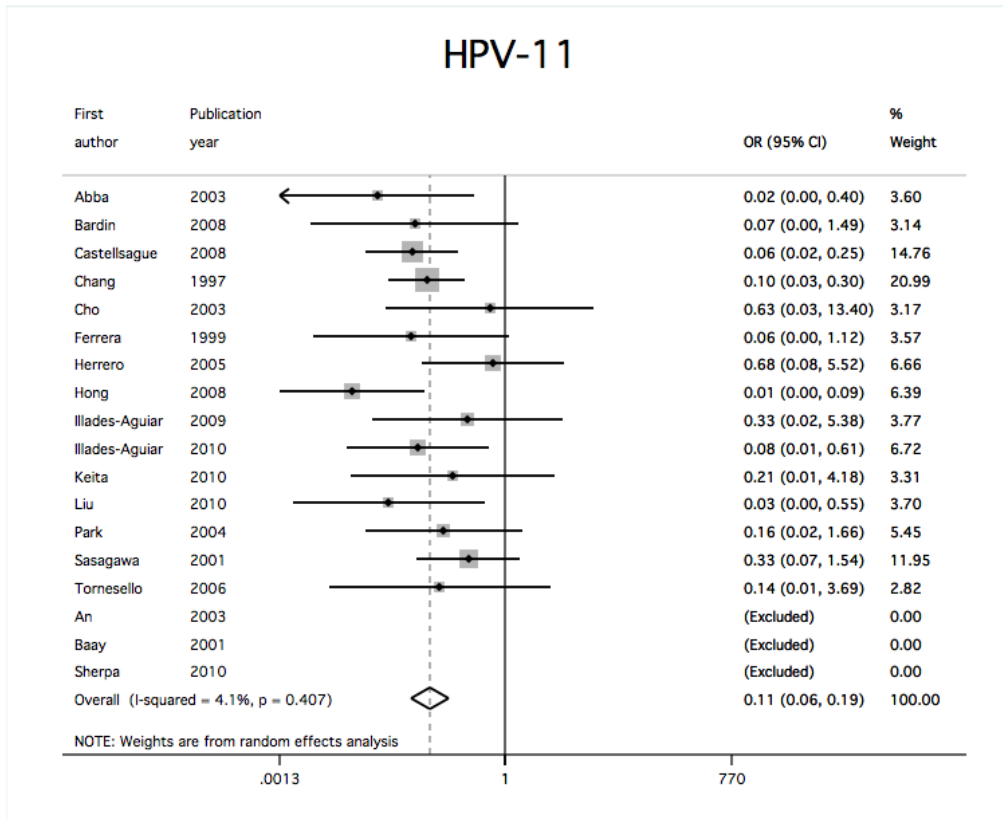

(c)

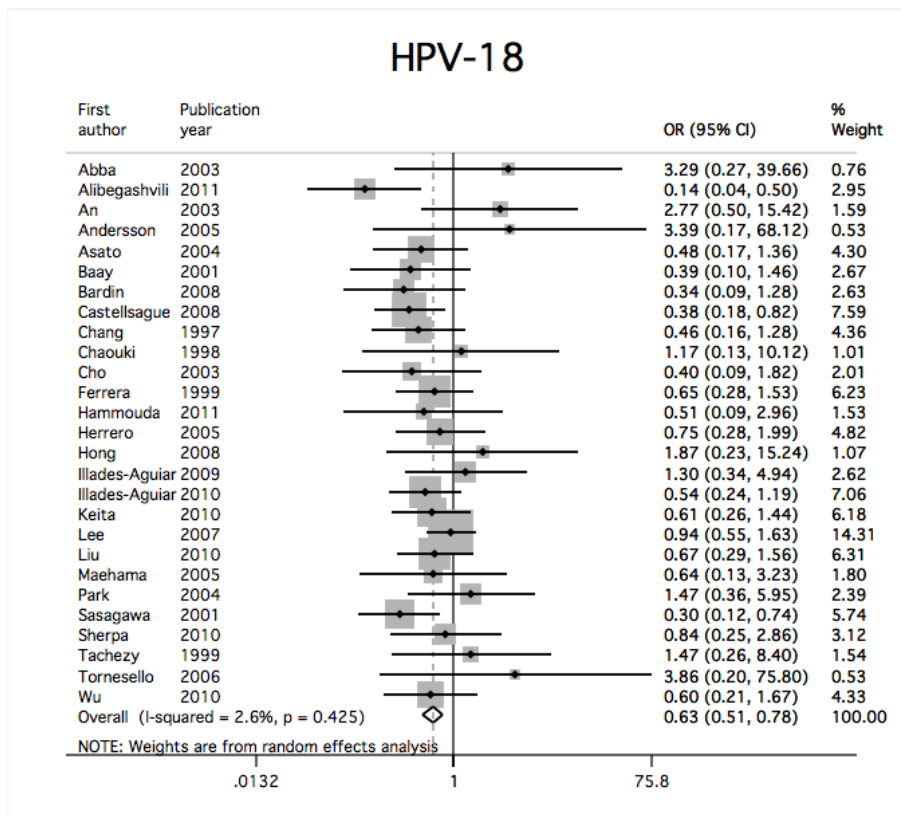

(d)

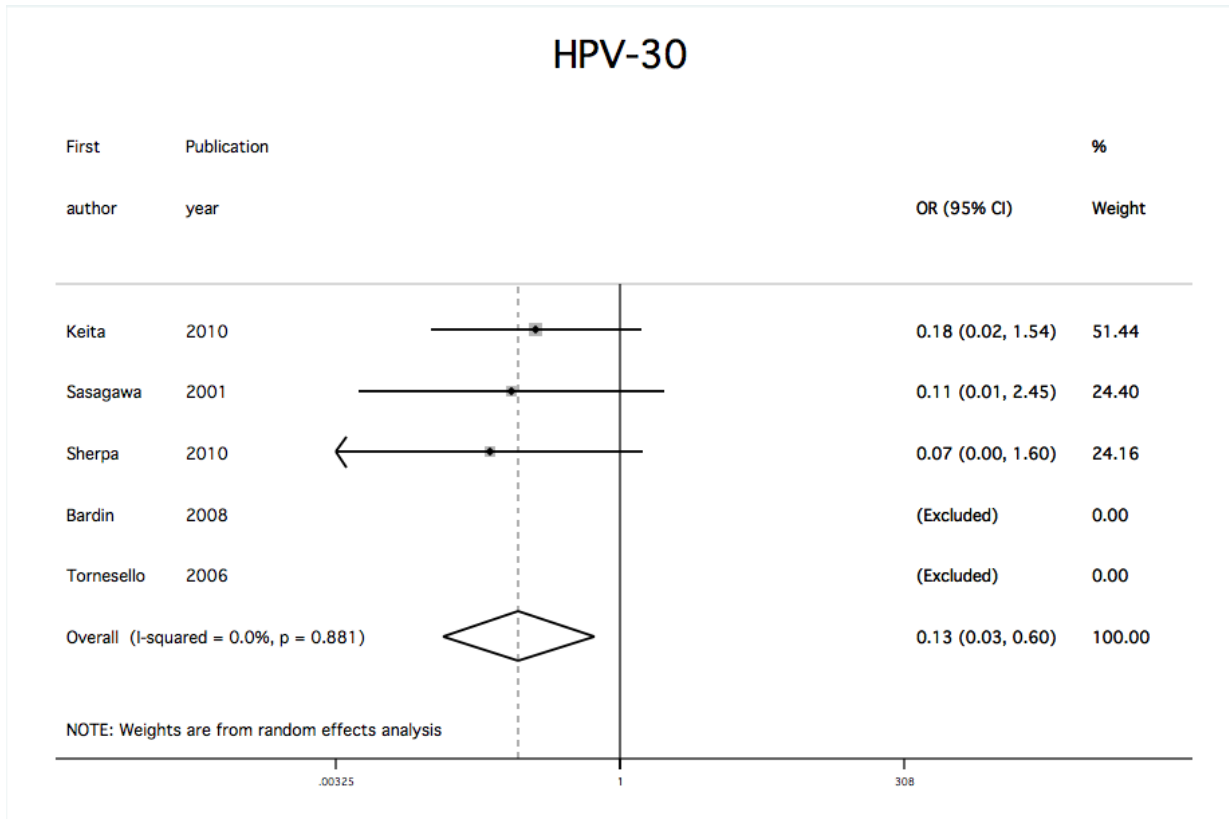

(e)

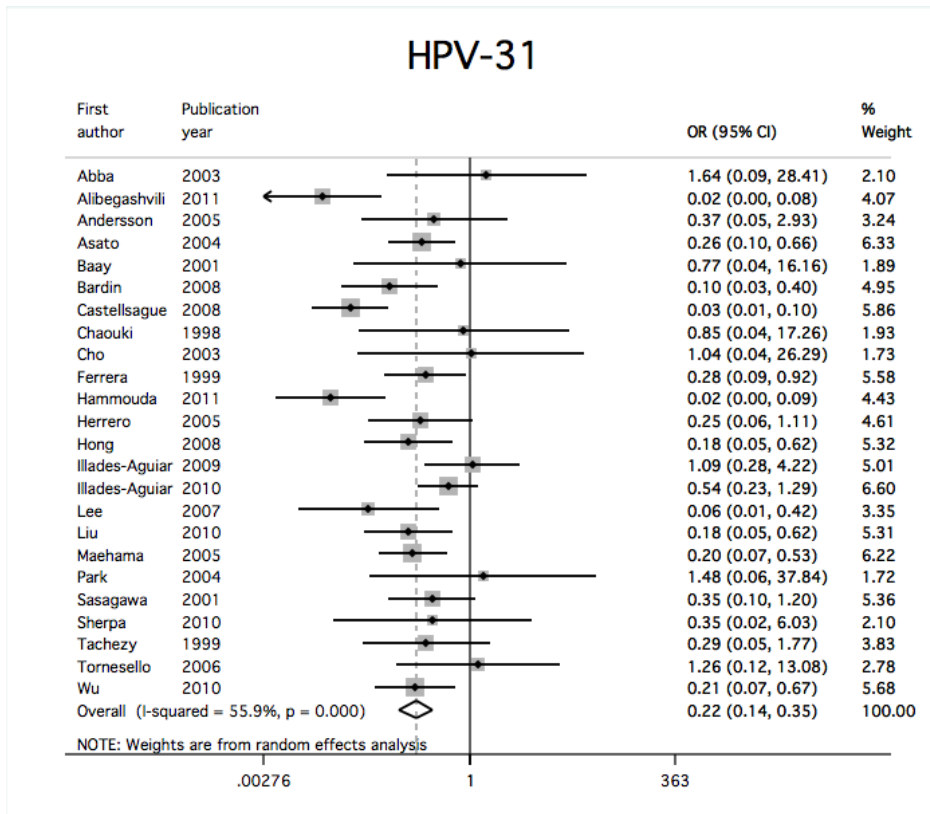

(f)

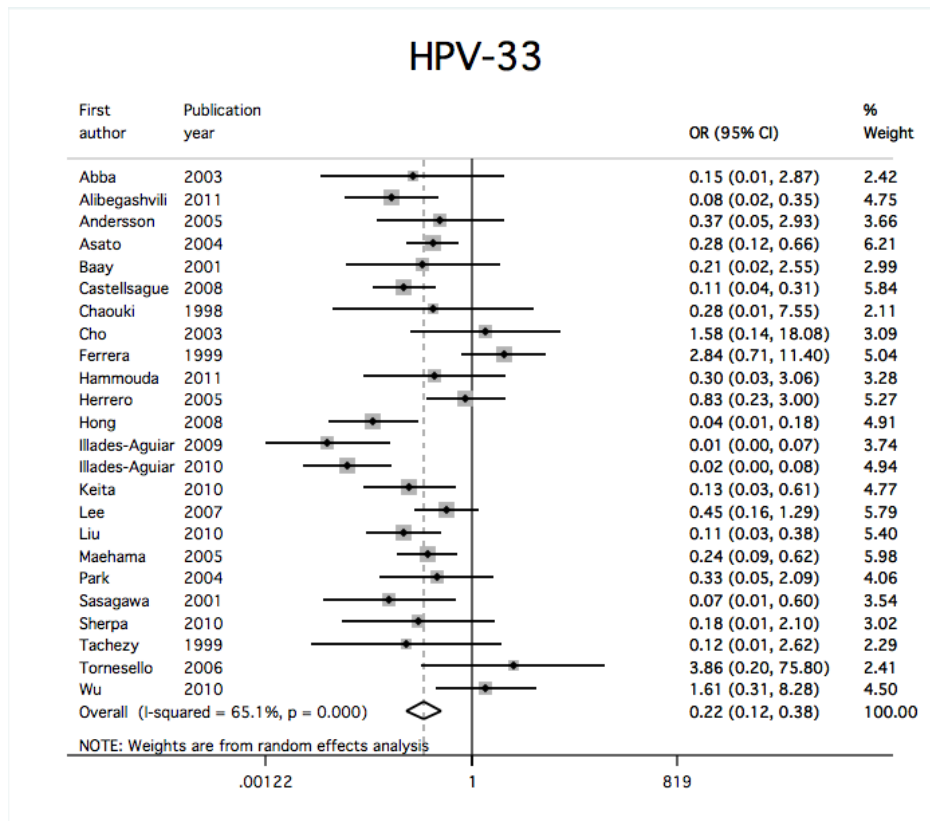

(g)

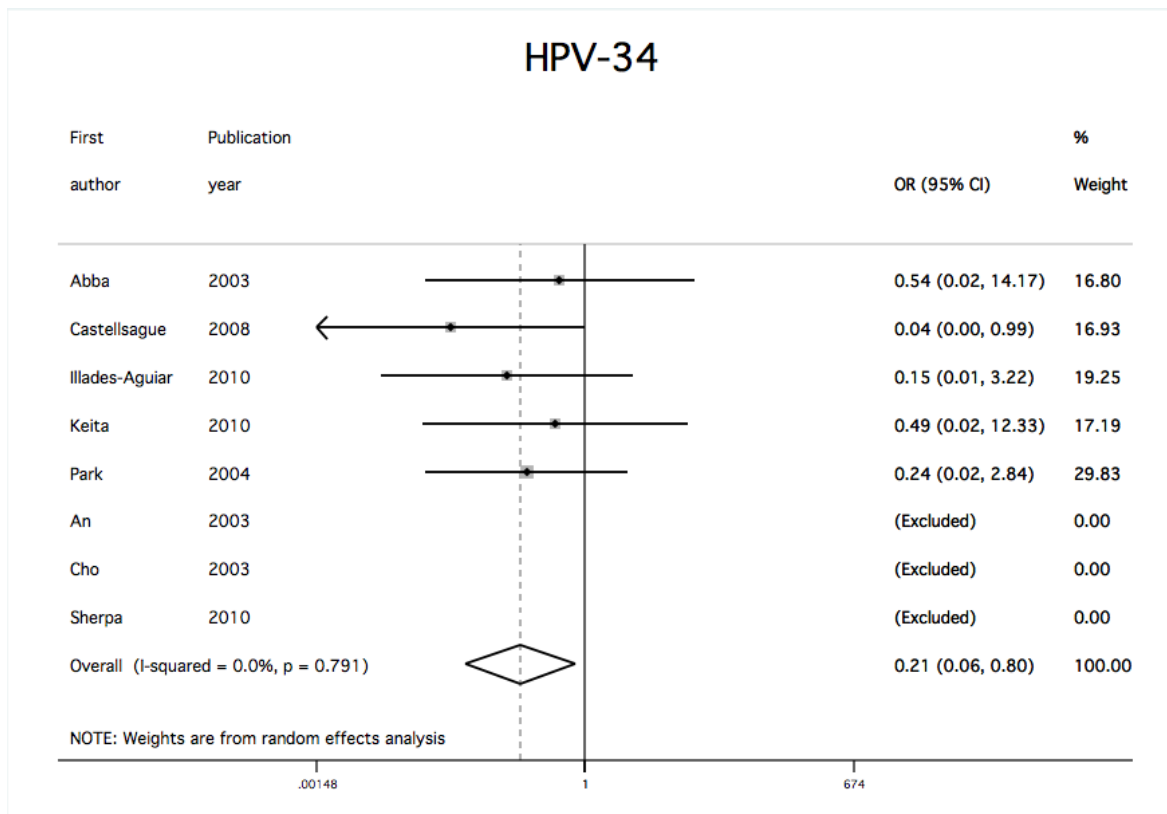

(h)

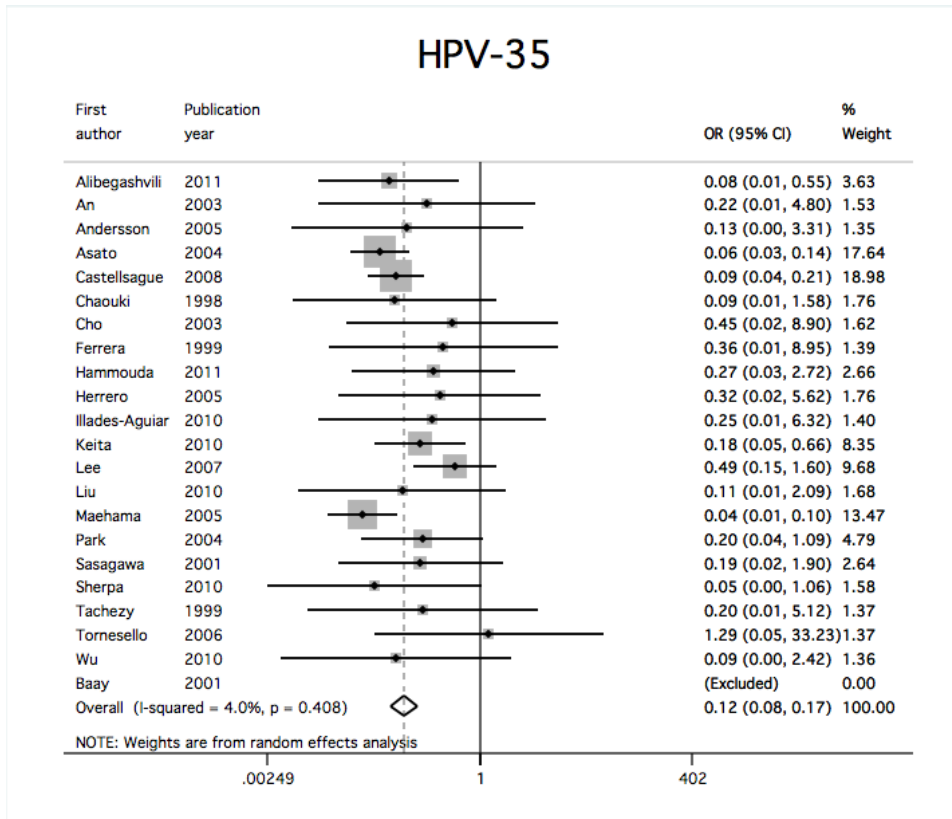

(i)

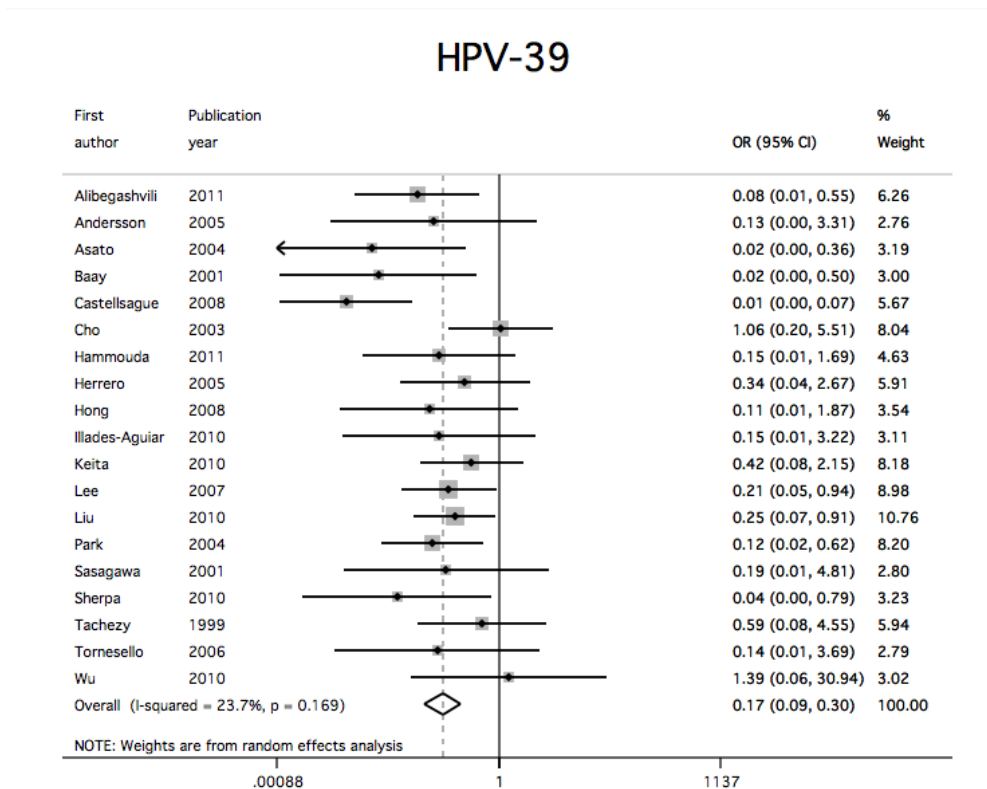

(j)

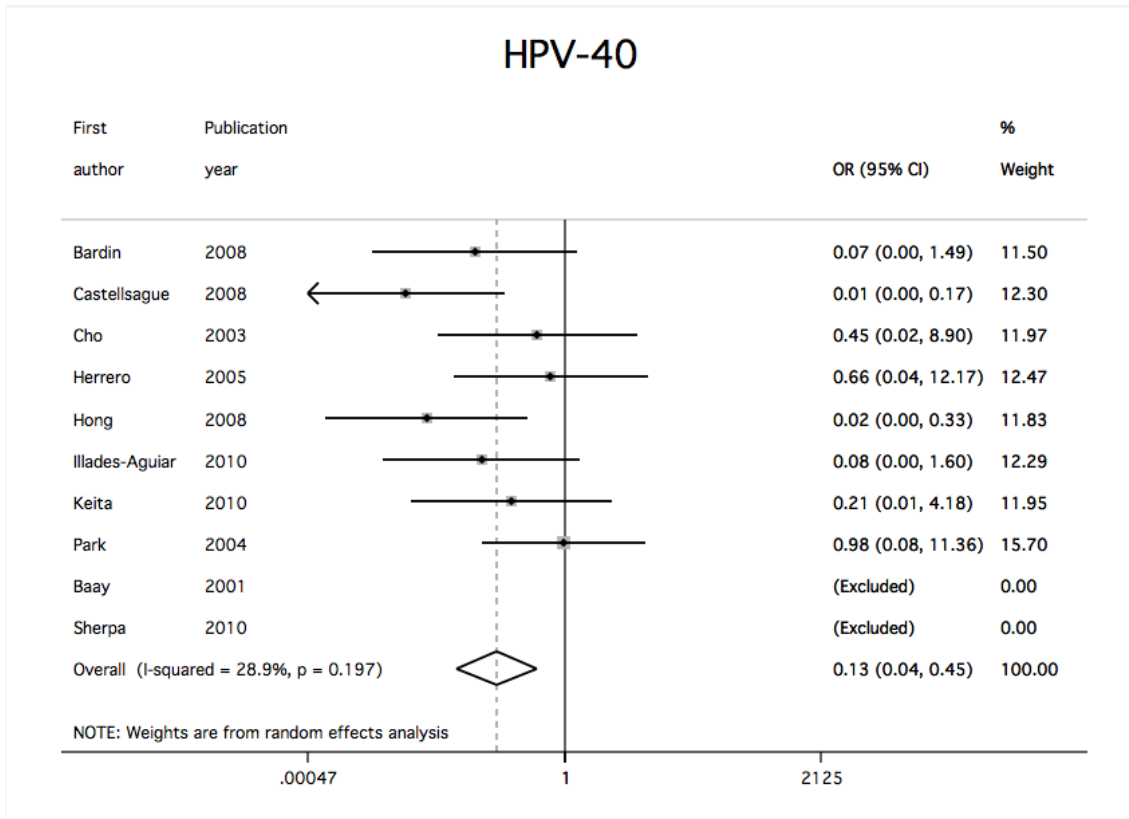

(k)

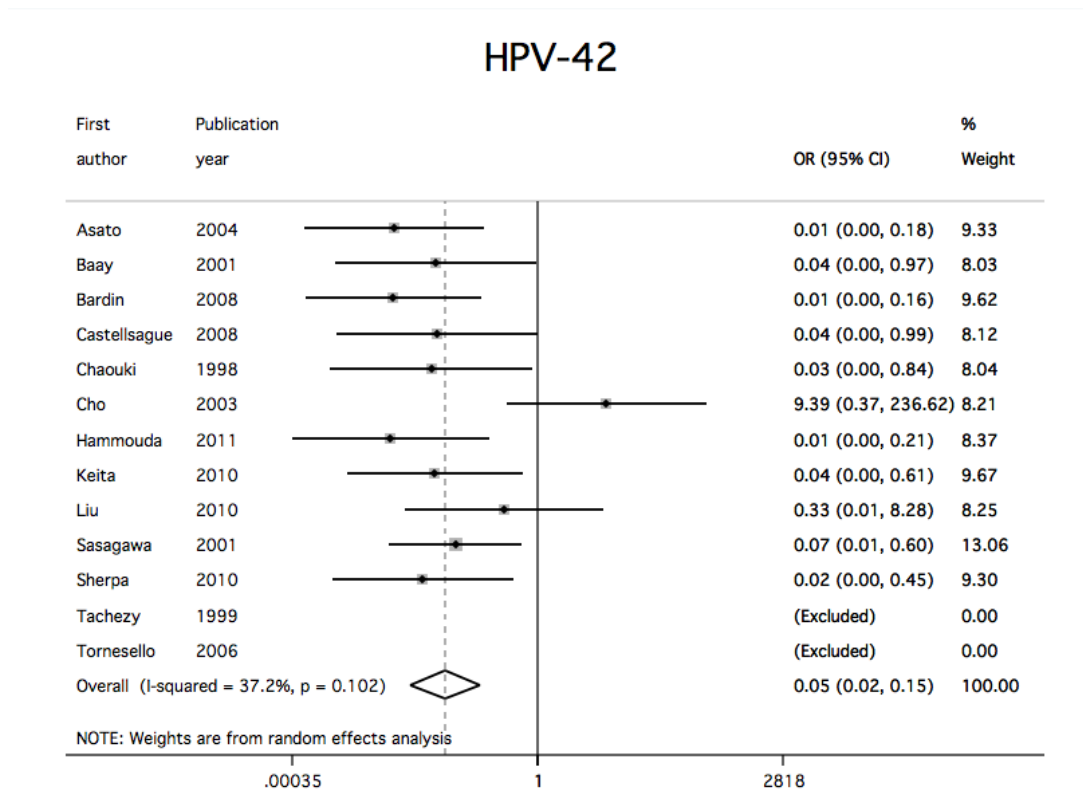

(1)

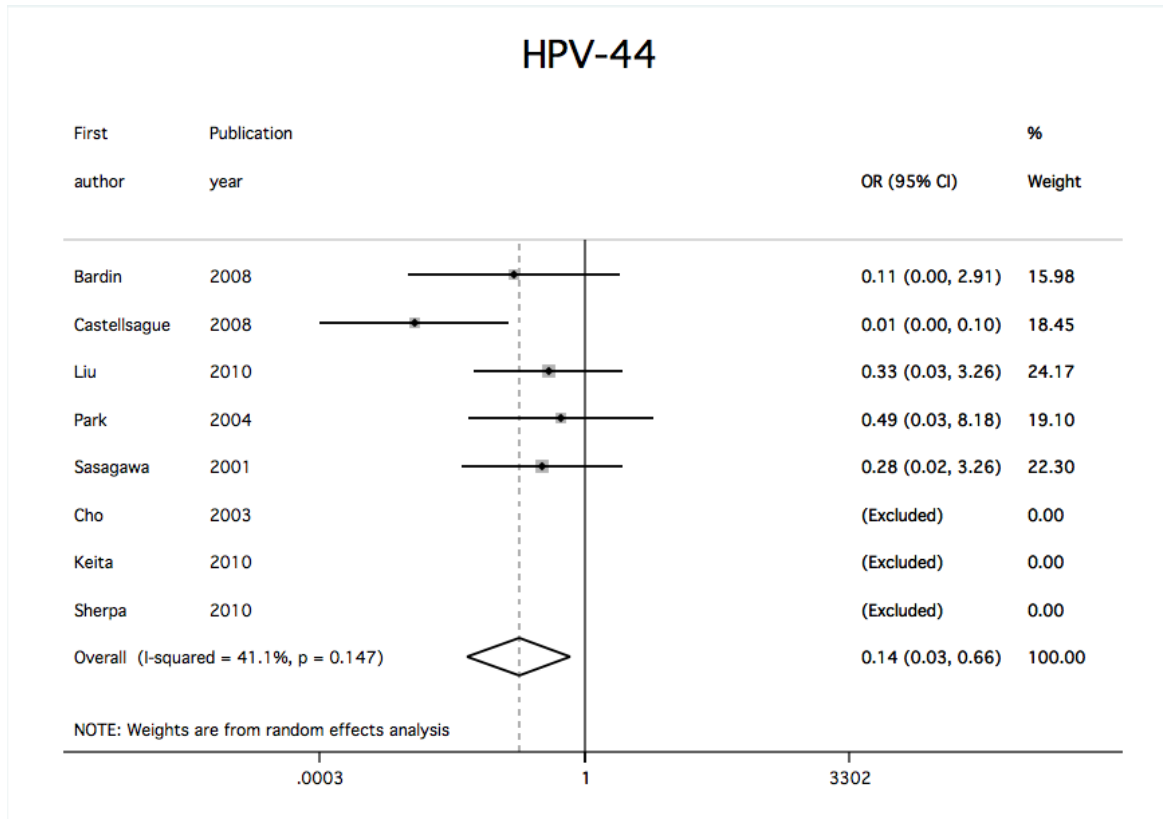

(m)

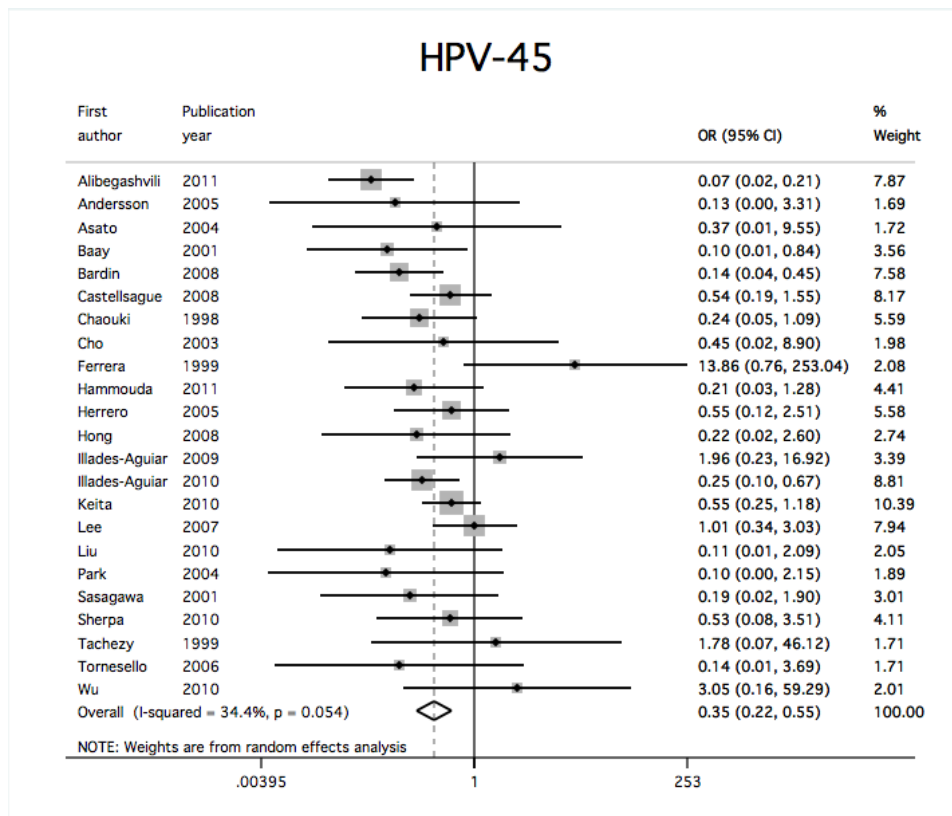

(n)

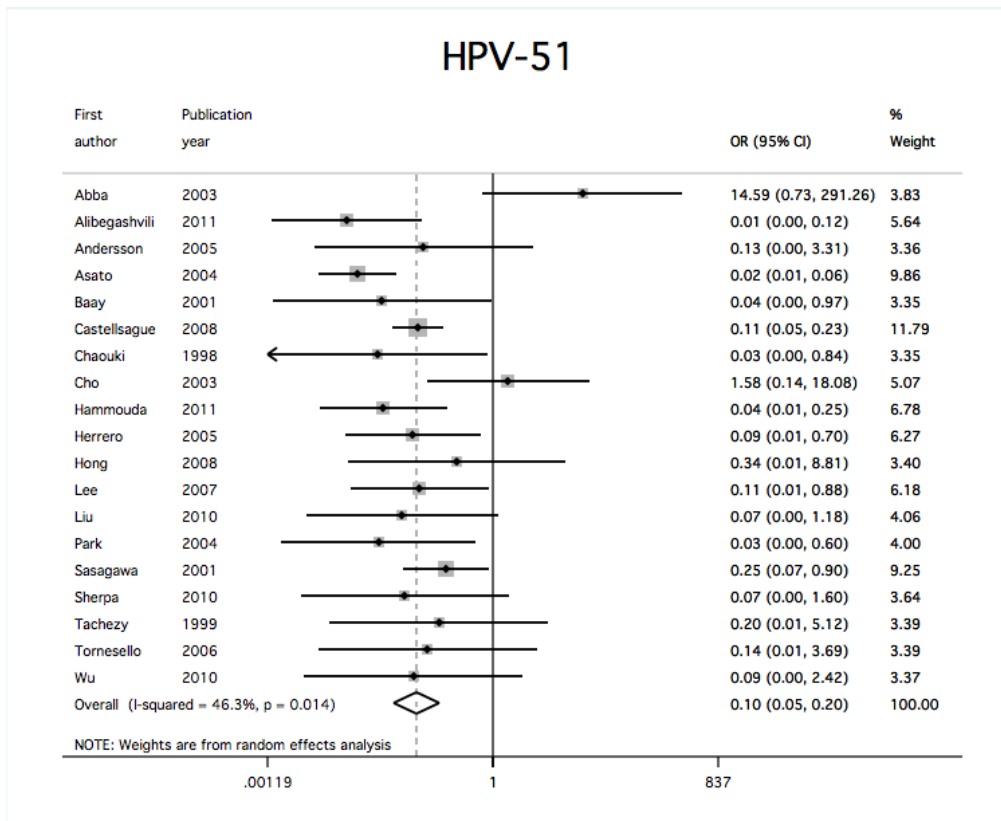

(o)

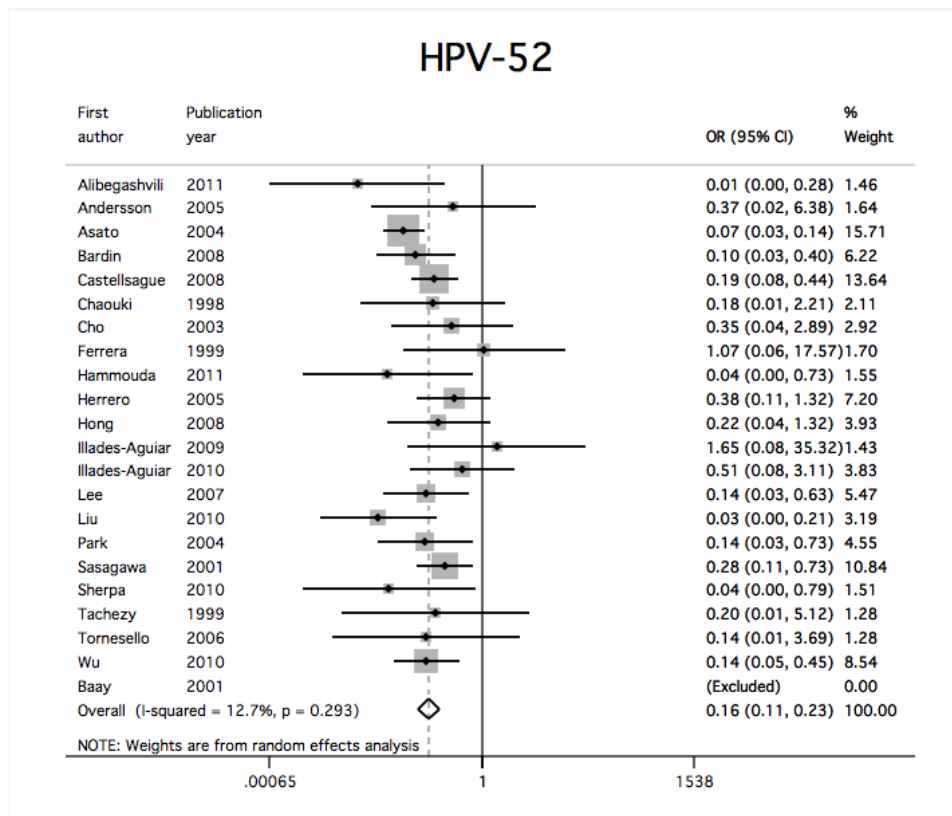



(p)

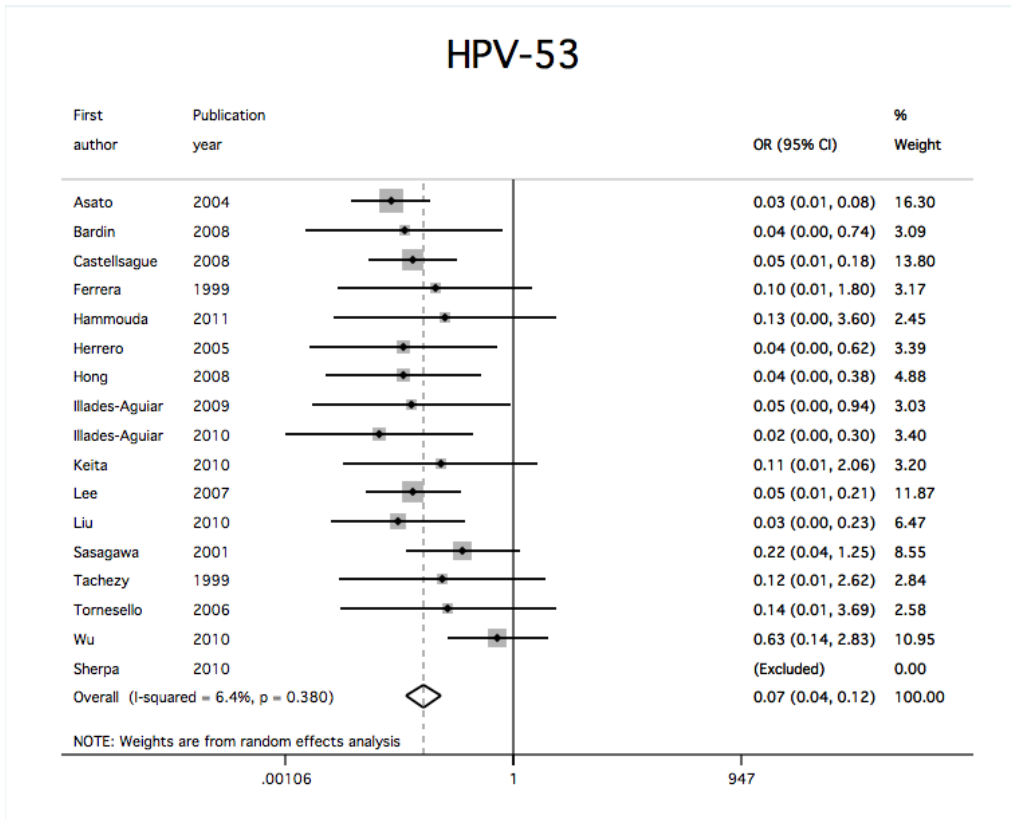

(q)

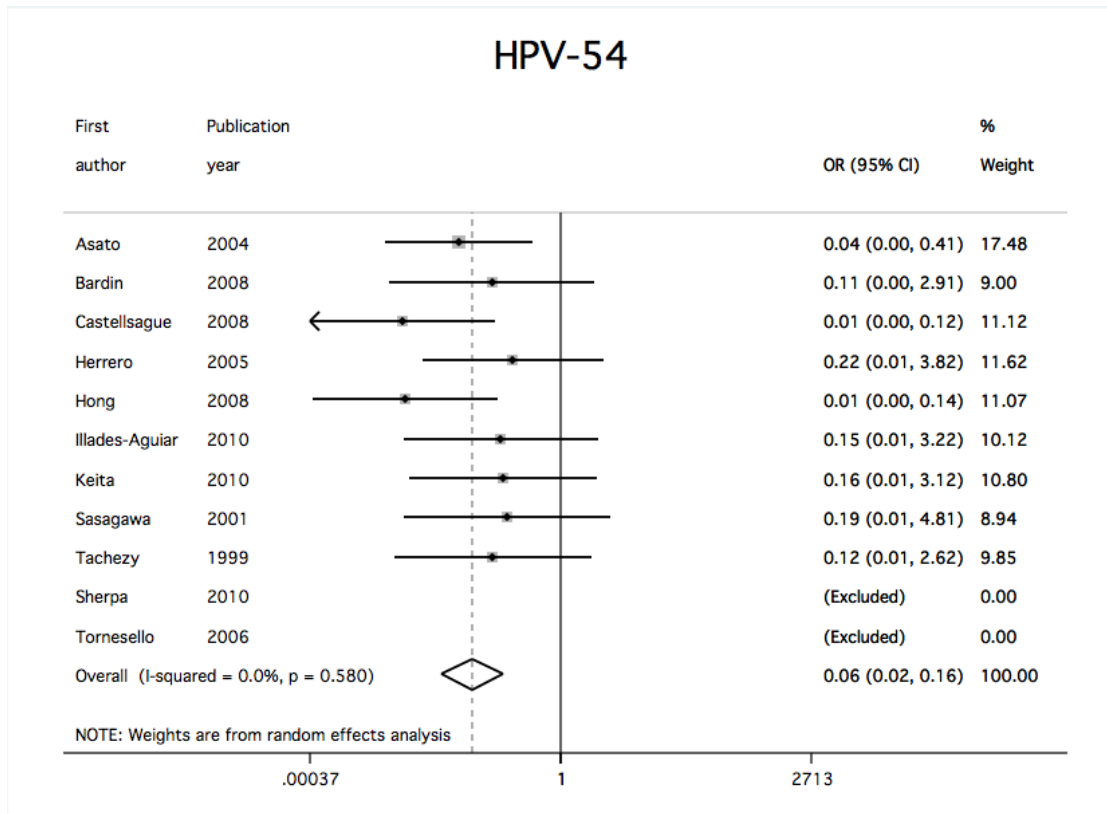

(r)

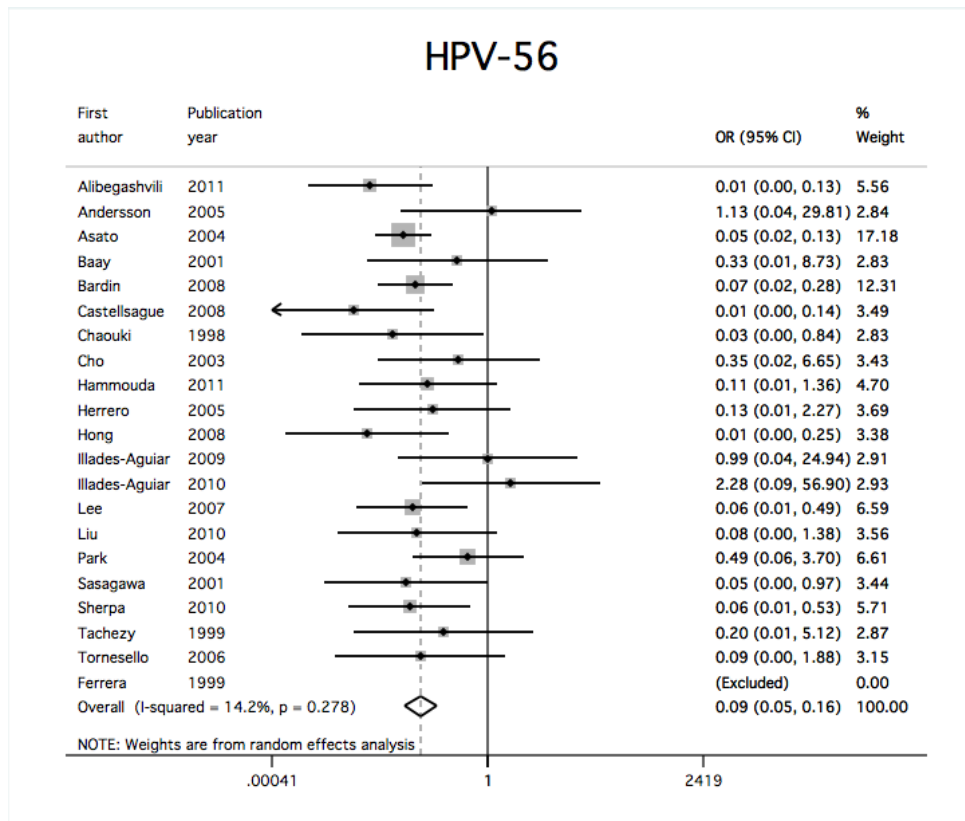

(s)

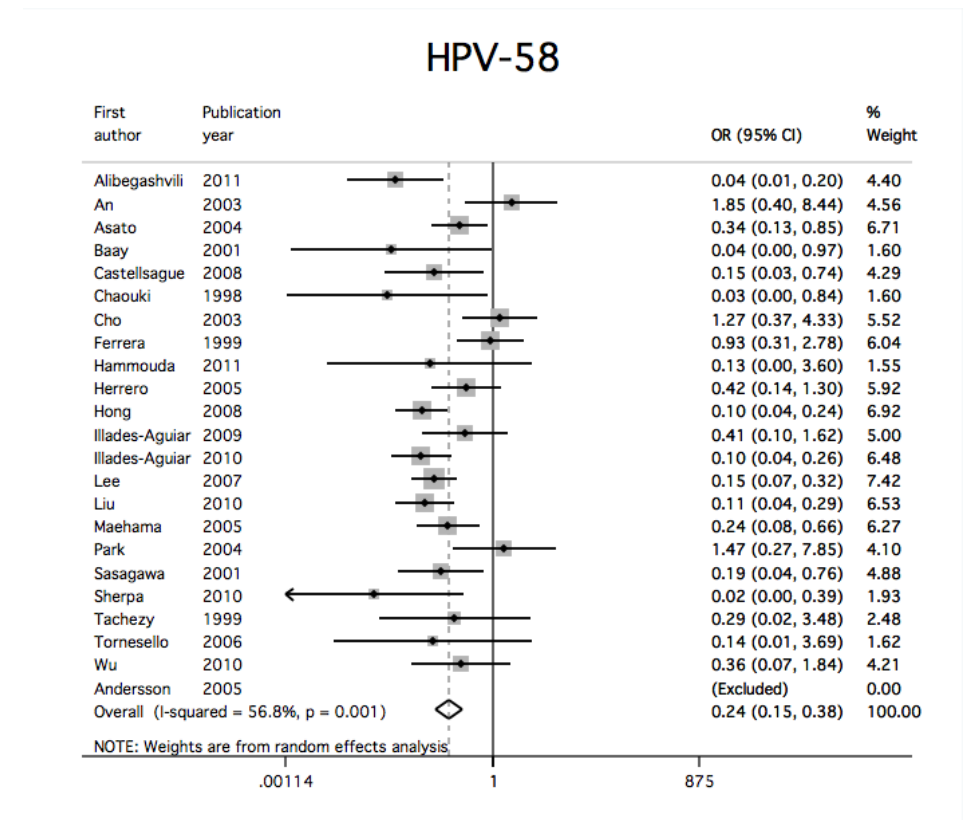

(t)

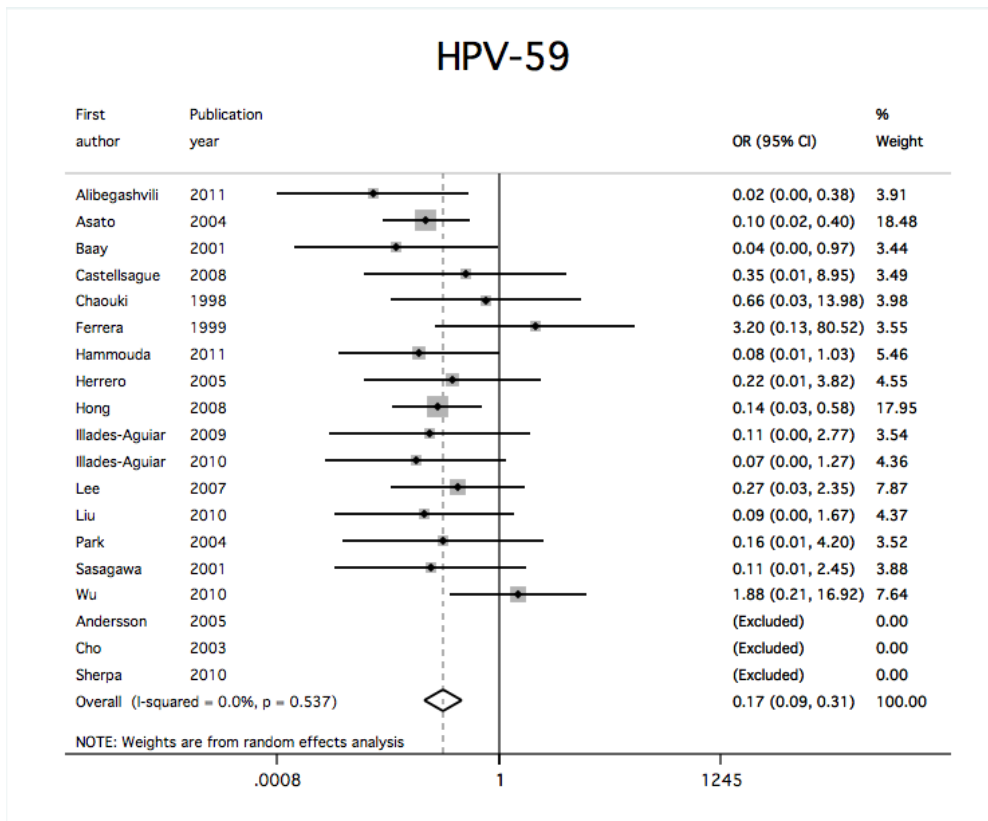

(u)

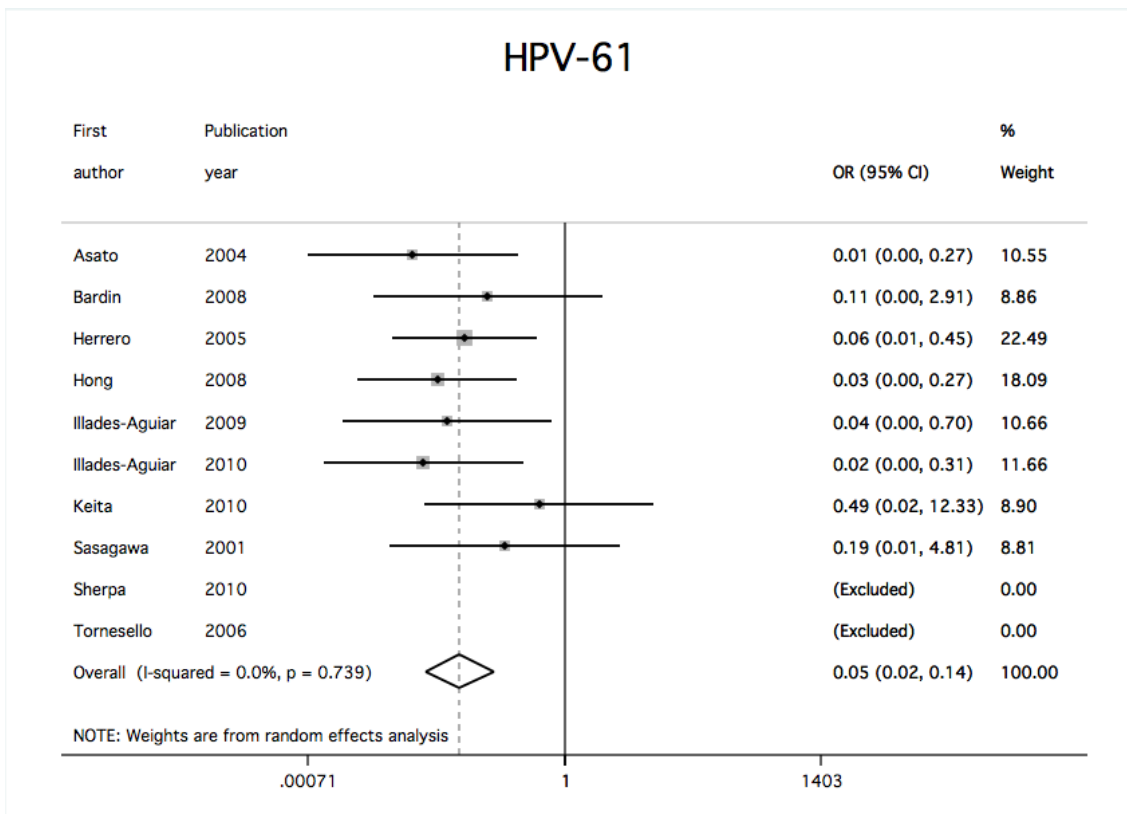

(v)

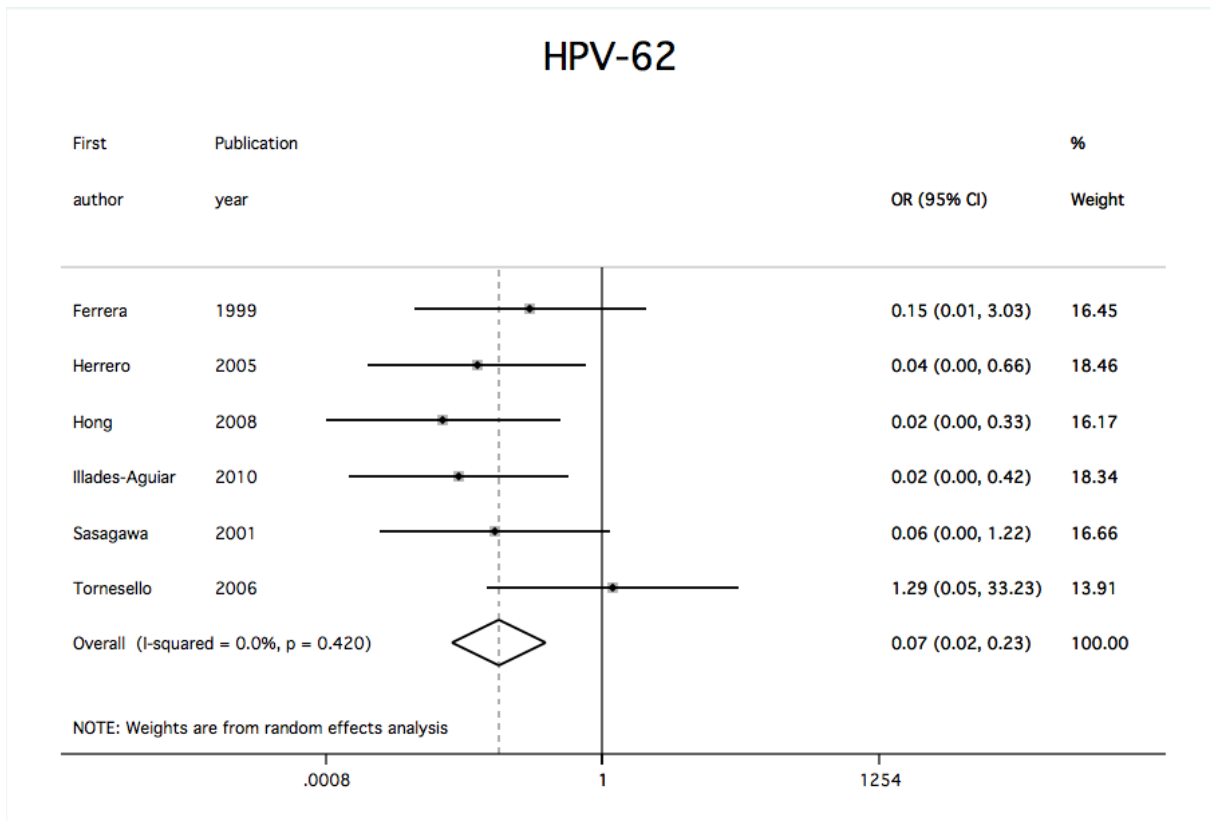

(w)

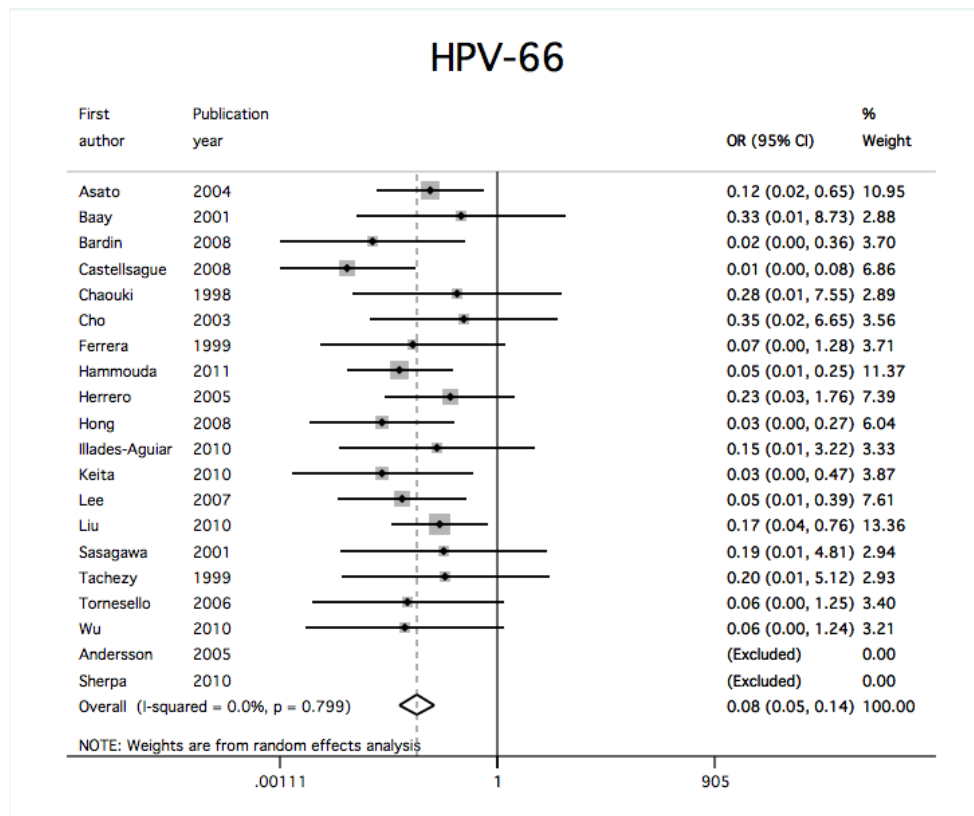

(x)

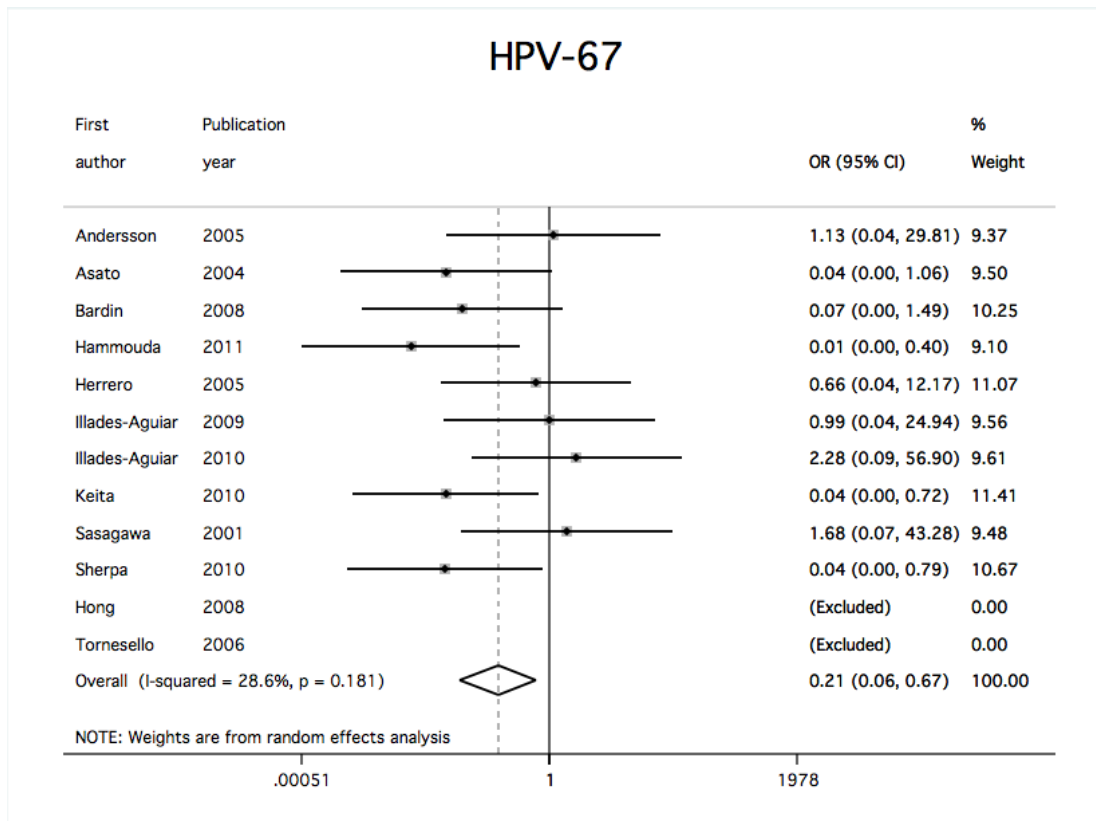

(y)

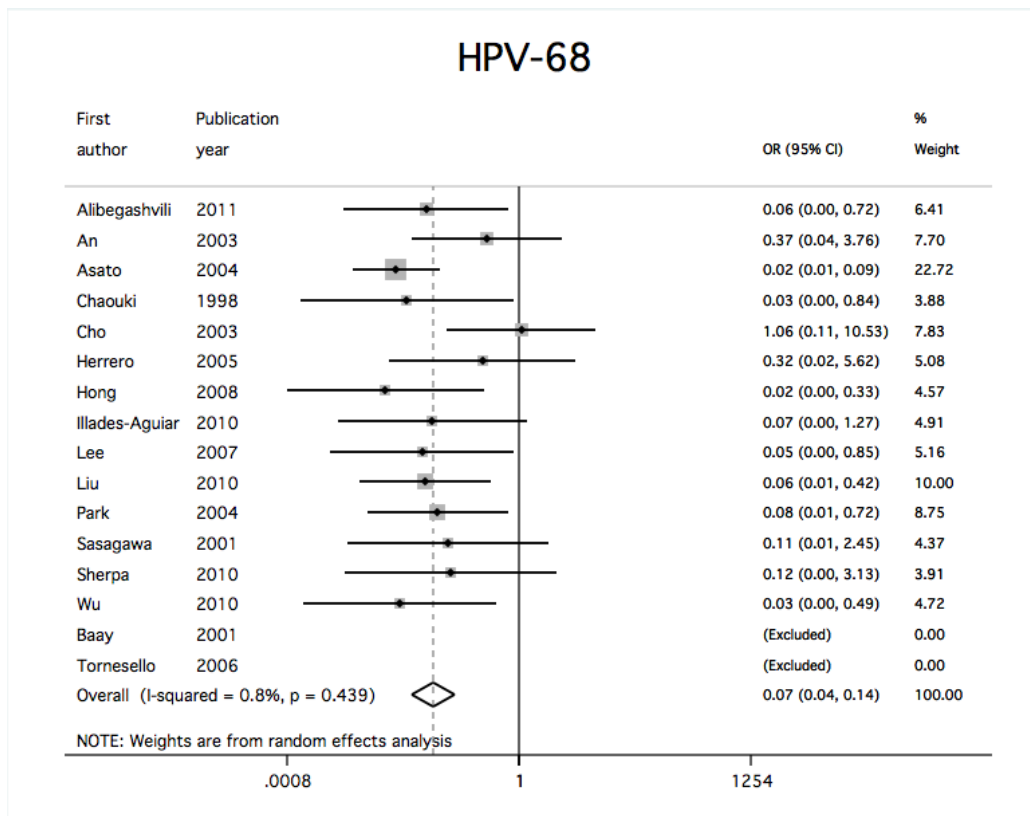

(z)

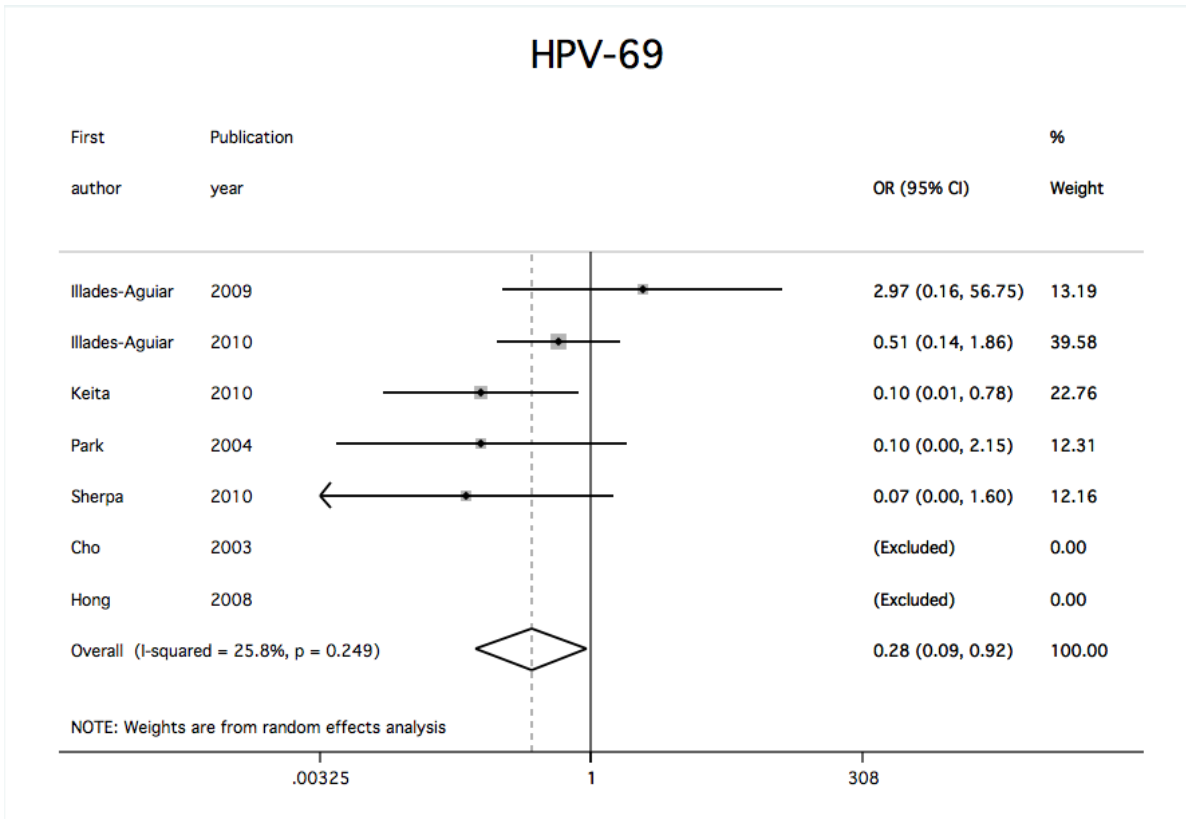

(aa)

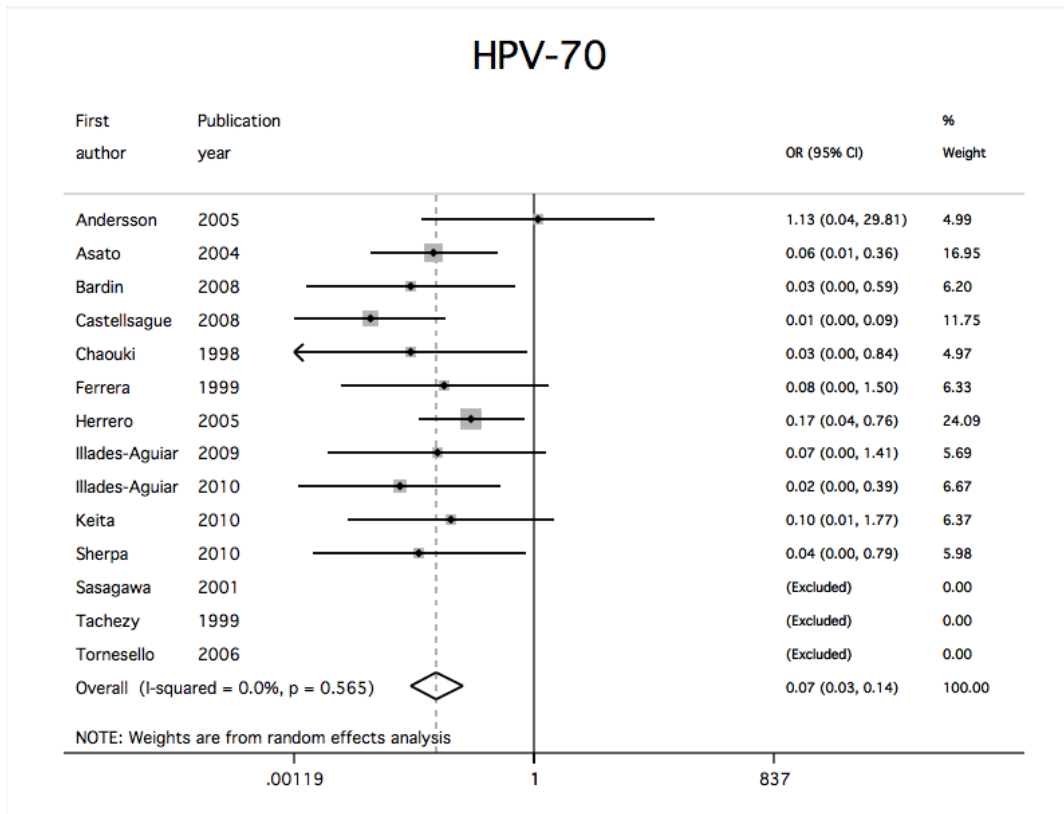

(ab)

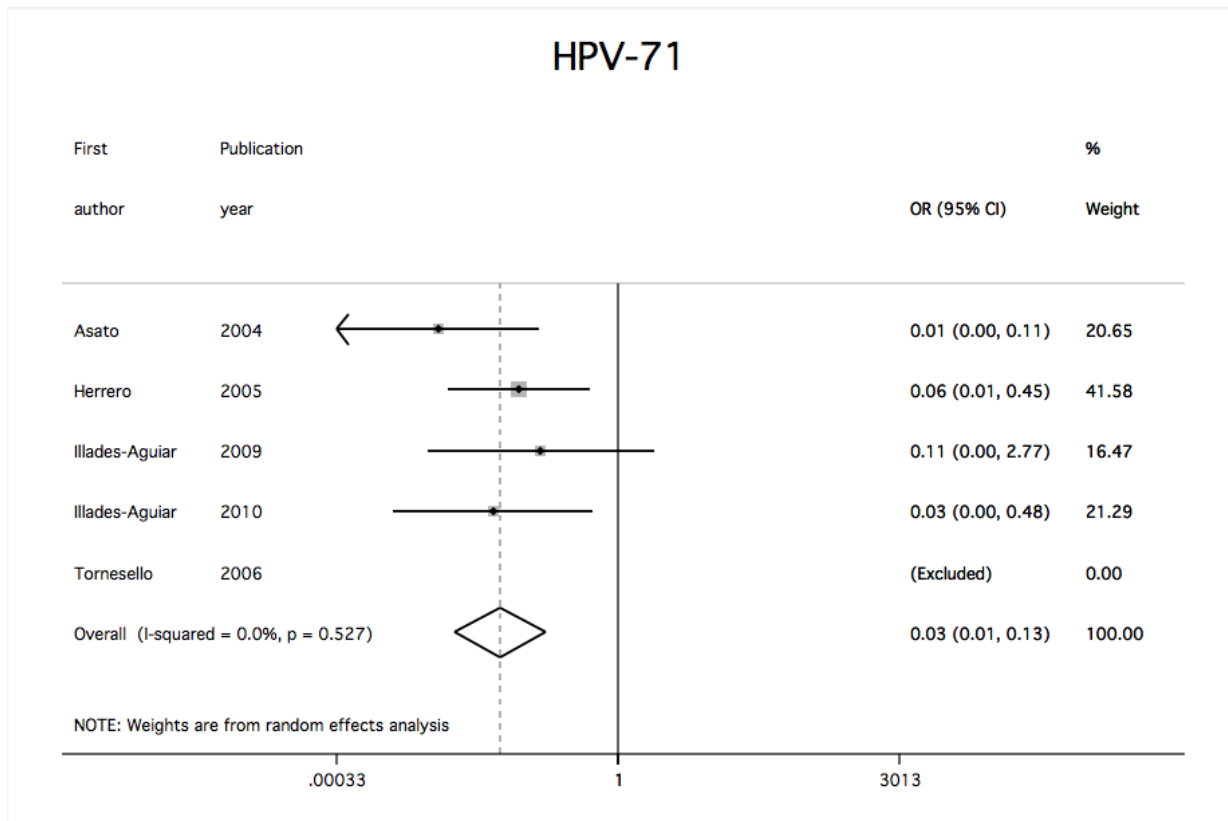

(ac)

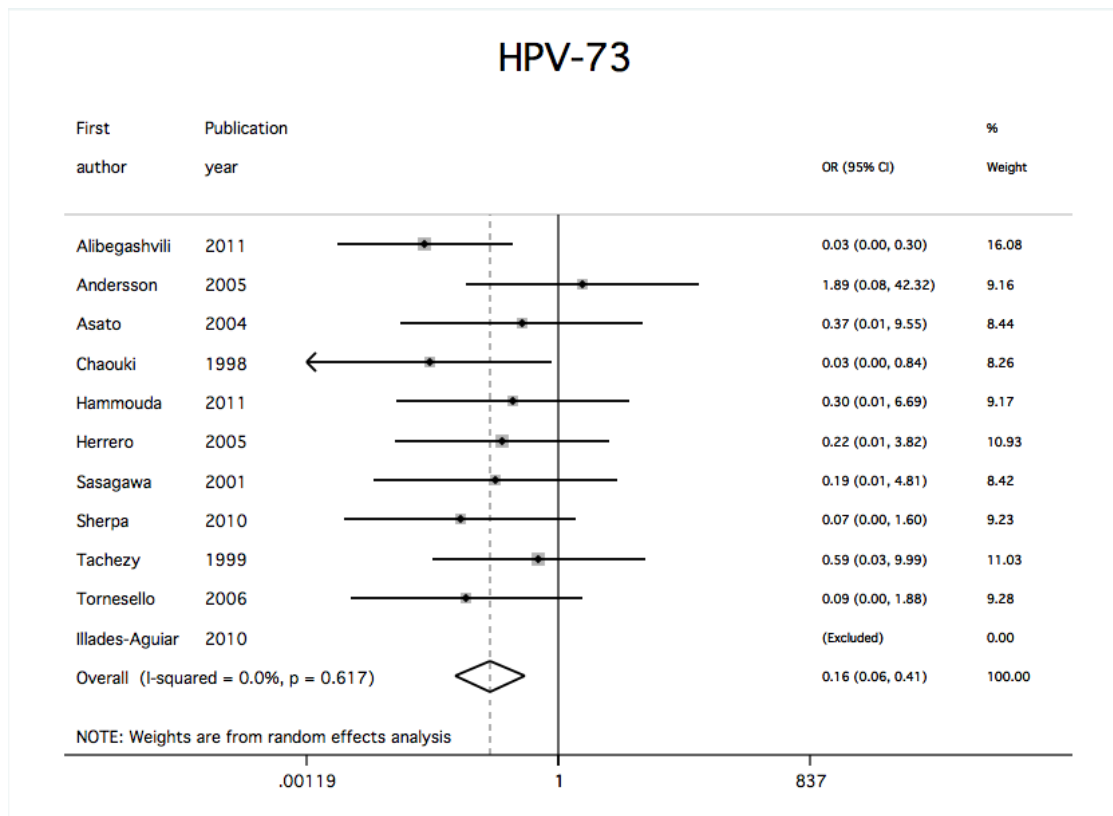

(ad)

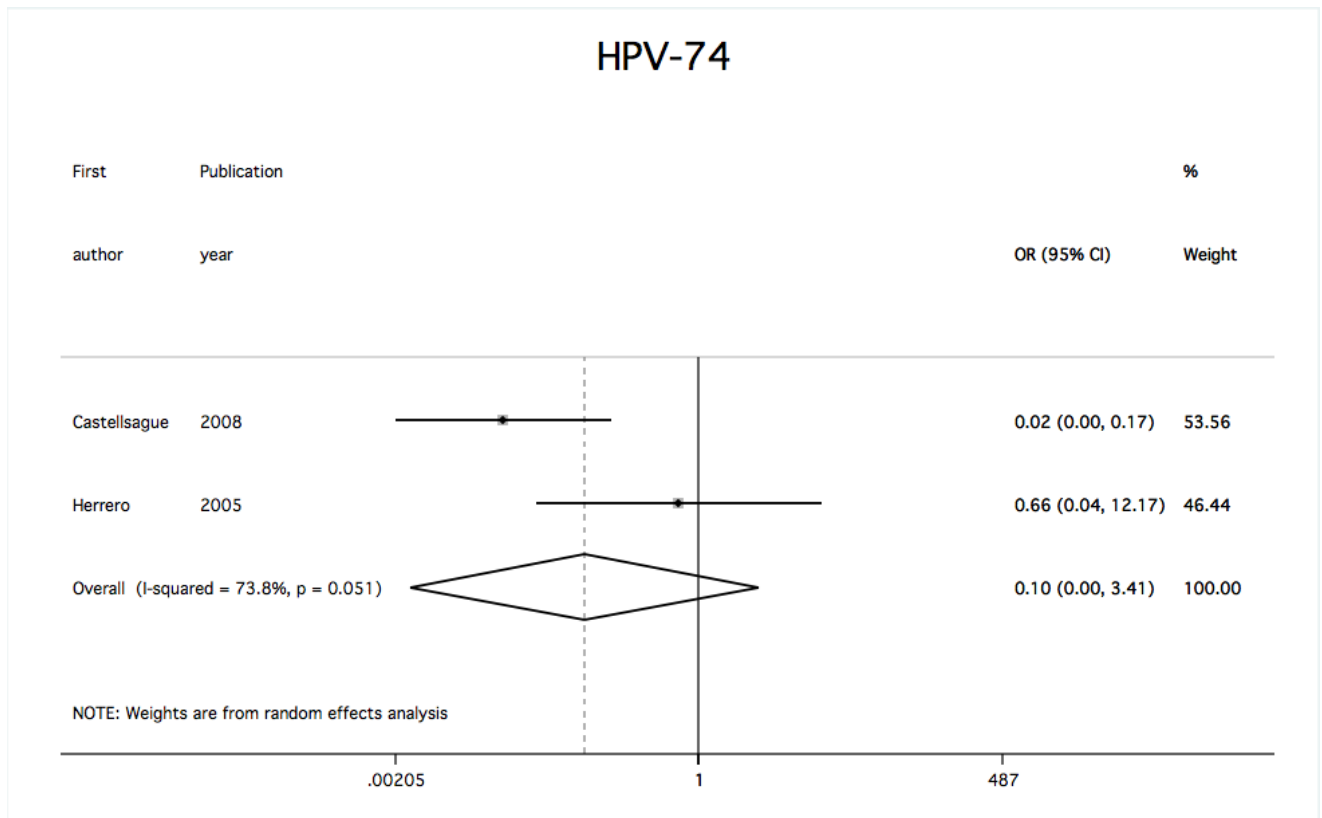

(ae)

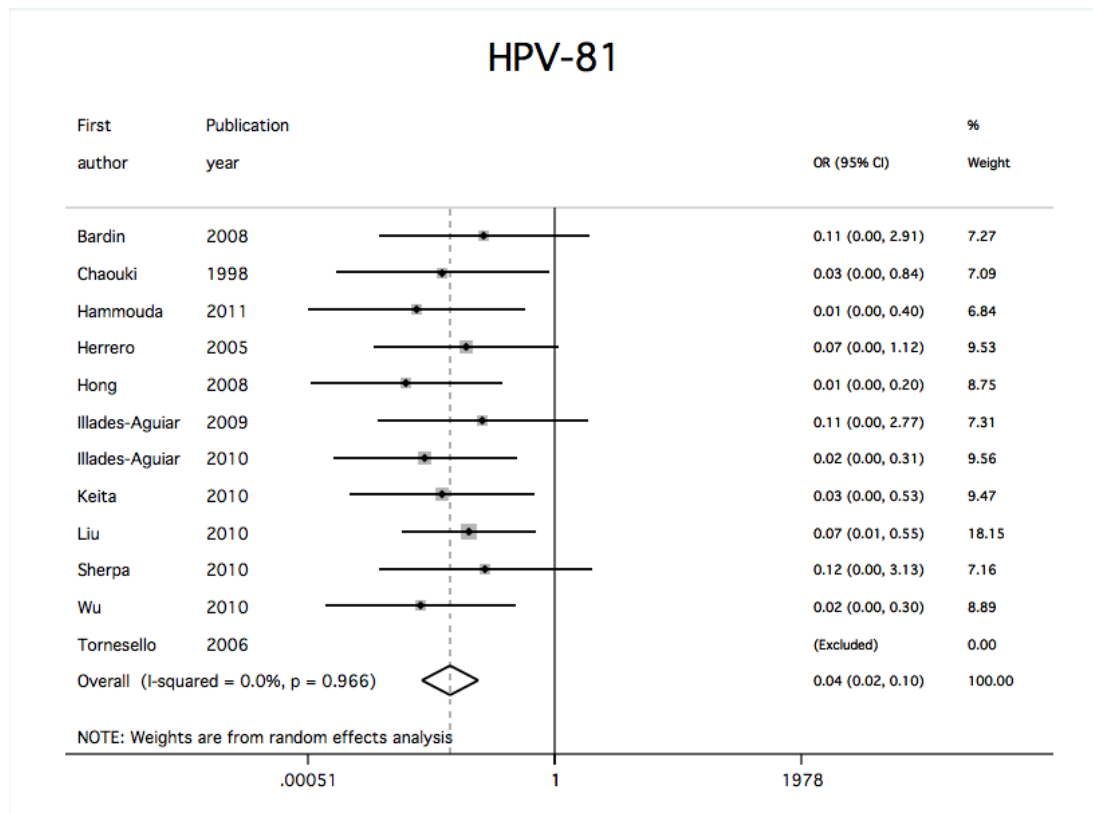



(af)

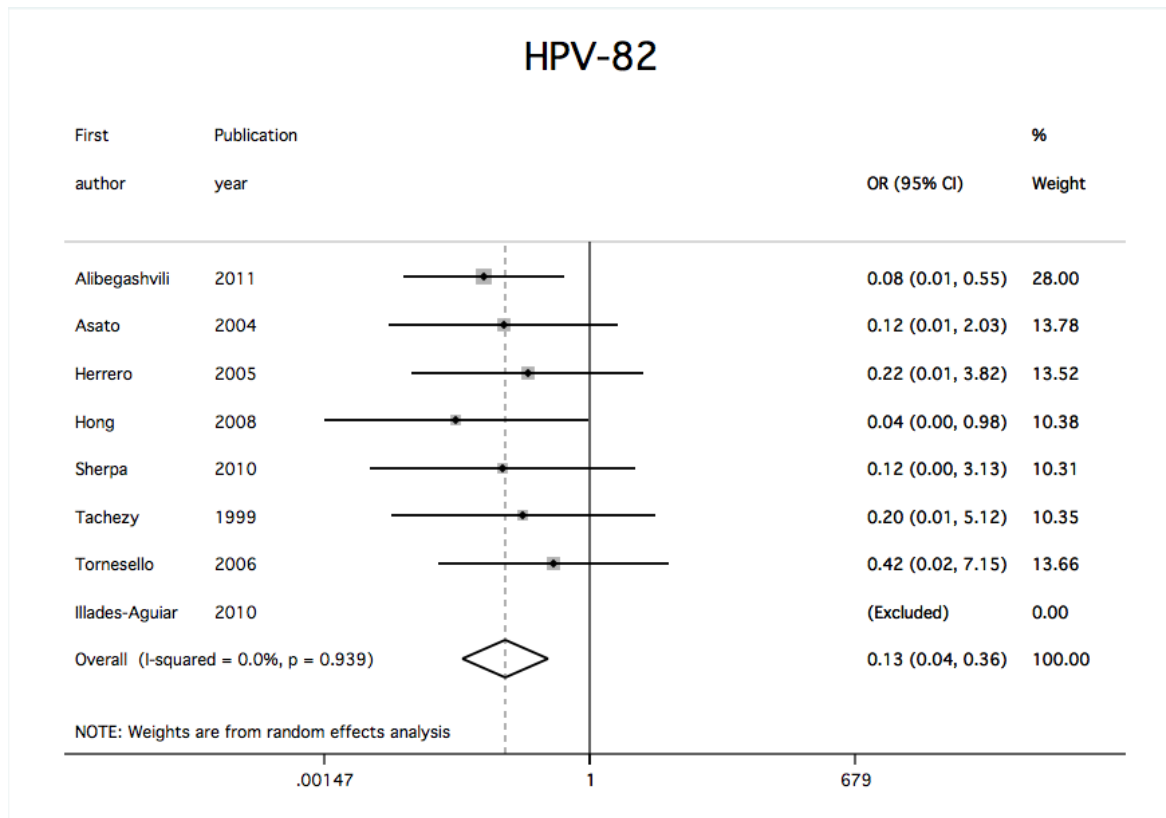

Supplement: 1471-2334-13-373-S2.pdf [file 1471-2334-13-373-S2.pdf]
