# Supplementary material for: Comparing human papillomavirus prevalences in women with normal cytology or invasive cervical cancer to rank genotypes according to their oncogenic potential: a meta-analysis of observational studies
Source: PubMed Central journal article supplement (PMC3751808; doi:10.1186/1471-2334-13-373), 2013-08-13
Supplement: 1471-2334-13-373-S4.pdf [file 1471-2334-13-373-S4.pdf]

**Additional file 4: Sensitivity analyses of human papillomavirus genotype ranking**

| Rank | Peto's method* |           |            | Continuity correction = 0.25† |           |            | Continuity correction = 0‡ |           |             | HPV-negative§ |           |              |
|------|----------------|-----------|------------|-------------------------------|-----------|------------|----------------------------|-----------|-------------|---------------|-----------|--------------|
|      | HPV-           | Pooled OR | 95% CI     | HPV-                          | Pooled OR | 95% CI     | HPV-                       | Pooled OR | 95% CI      | HPV-          | Pooled OR | 95% CI       |
| 1    | 18             | 0.65      | 0.52, 0.80 | 18                            | 0.63      | 0.50, 0.78 | 40                         | 0.98      | 0.08, 11.36 | 16            | 136.7     | 70.0, 266.9  |
| 2    | 45             | 0.36      | 0.26, 0.49 | 45                            | 0.33      | 0.21, 0.53 | 18                         | 0.62      | 0.50, 0.77  | 18            | 99.1      | 49.8, 197.2  |
| 3    | 69             | 0.32      | 0.15, 0.67 | 69                            | 0.26      | 0.07, 1.00 | 44                         | 0.35      | 0.08, 1.46  | 67            | 89.8      | 13.6, 593.6  |
| 4    | 58             | 0.23      | 0.18, 0.29 | 58                            | 0.25      | 0.16, 0.40 | 45                         | 0.32      | 0.20, 0.52  | 69            | 81.0      | 5.0, 1,313.3 |
| 5    | 31             | 0.19      | 0.14, 0.25 | 33                            | 0.21      | 0.12, 0.38 | 58                         | 0.28      | 0.17, 0.45  | 45            | 70.5      | 34.3, 144.8  |
| 6    | 33             | 0.18      | 0.14, 0.23 | 31                            | 0.21      | 0.13, 0.34 | 69                         | 0.27      | 0.05, 1.38  | 73            | 48.2      | 11.1, 209.5  |
| 7    | 30             | 0.16      | 0.05, 0.53 | 67                            | 0.17      | 0.04, 0.77 | 34                         | 0.24      | 0.02, 2.84  | 31            | 46.5      | 18.8, 115.3  |
| 8    | 52             | 0.16      | 0.12, 0.21 | 39                            | 0.17      | 0.09, 0.31 | 33                         | 0.20      | 0.11, 0.37  | 33            | 39.5      | 16.4, 94.9   |
| 9    | 67             | 0.15      | 0.07, 0.34 | 34                            | 0.16      | 0.03, 0.80 | 59                         | 0.20      | 0.07, 0.57  | 58            | 35.0      | 14.9, 82.4   |
| 10   | 39             | 0.14      | 0.09, 0.22 | 59                            | 0.16      | 0.08, 0.31 | 39                         | 0.20      | 0.10, 0.40  | 82            | 34.3      | 6.8, 172.3   |
| 11   | 59             | 0.13      | 0.07, 0.25 | 52                            | 0.16      | 0.11, 0.23 | 31                         | 0.19      | 0.12, 0.32  | 59            | 33.4      | 14.3, 78.2   |
| 12   | 73             | 0.12      | 0.05, 0.32 | 44                            | 0.15      | 0.03, 0.80 | 30                         | 0.18      | 0.02, 1.54  | 52            | 25.2      | 11.1, 57.2   |
| 13   | 34             | 0.11      | 0.03, 0.50 | 73                            | 0.13      | 0.04, 0.42 | 52                         | 0.16      | 0.11, 0.24  | 35            | 21.0      | 10.0, 44.1   |
| 14   | 62             | 0.11      | 0.06, 0.21 | 30                            | 0.12      | 0.02, 0.66 | 82                         | 0.13      | 0.03, 0.53  | 56            | 20.6      | 6.8, 63.0    |
| 15   | 11             | 0.11      | 0.07, 0.16 | 82                            | 0.11      | 0.03, 0.35 | 6                          | 0.12      | 0.05, 0.29  | 39            | 18.0      | 6.6, 48.8    |
| 16   | 53             | 0.10      | 0.08, 0.14 | 40                            | 0.10      | 0.03, 0.42 | 11                         | 0.12      | 0.05, 0.26  | 51            | 16.2      | 7.0, 37.9    |
| 17   | 35             | 0.10      | 0.07, 0.14 | 35                            | 0.10      | 0.07, 0.15 | 73                         | 0.12      | 0.01, 2.28  | 61            | 16.1      | 4.9, 53.1    |
| 18   | 66             | 0.10      | 0.07, 0.15 | 11                            | 0.10      | 0.06, 0.18 | 35                         | 0.11      | 0.06, 0.20  | 44            | 14.9      | 0.7, 304.6   |
| 19   | 81             | 0.09      | 0.06, 0.15 | 51                            | 0.09      | 0.04, 0.18 | 68                         | 0.10      | 0.03, 0.33  | 40            | 13.7      | 1.5, 125.4   |
| 20   | 51             | 0.09      | 0.07, 0.13 | 6                             | 0.08      | 0.04, 0.16 | 51                         | 0.08      | 0.03, 0.20  | 30            | 13.4      | 2.8, 63.8    |
| 21   | 82             | 0.09      | 0.03, 0.28 | 56                            | 0.07      | 0.04, 0.12 | 53                         | 0.07      | 0.03, 0.18  | 68            | 12.3      | 4.3, 35.3    |
| 22   | 6              | 0.08      | 0.06, 0.13 | 66                            | 0.07      | 0.04, 0.13 | 81                         | 0.07      | 0.01, 0.55  | 74            | 12.2      | 0.0, 7,404.2 |
| 23   | 68             | 0.08      | 0.05, 0.13 | 53                            | 0.06      | 0.04, 0.11 | 42                         | 0.07      | 0.01, 0.60  | 11            | 11.2      | 2.7, 46.5    |
| 24   | 70             | 0.08      | 0.05, 0.13 | 68                            | 0.06      | 0.03, 0.13 | 66                         | 0.07      | 0.03, 0.15  | 34            | 11.1      | 1.2, 106.0   |
| 25   | 56             | 0.07      | 0.05, 0.11 | 70                            | 0.06      | 0.02, 0.13 | 56                         | 0.07      | 0.03, 0.12  | 71            | 10.4      | 0.9, 117.3   |
| 26   | 61             | 0.07      | 0.04, 0.13 | 74                            | 0.05      | 0.00, 0.91 | 71                         | 0.06      | 0.01, 0.45  | 6             | 9.4       | 4.0, 21.8    |
| 27   | 71             | 0.07      | 0.03, 0.13 | 62                            | 0.04      | 0.01, 0.23 | 70                         | 0.05      | 0.01, 0.26  | 66            | 8.5       | 2.7, 26.6    |
| 28   | 40             | 0.05      | 0.02, 0.13 | 61                            | 0.04      | 0.01, 0.12 | 61                         | 0.04      | 0.01, 0.19  | 42            | 8.4       | 3.4, 20.7    |
| 29   | 42             | 0.05      | 0.03, 0.09 | 54                            | 0.04      | 0.01, 0.13 | 54                         | 0.04      | 0.00, 0.41  | 54            | 8.2       | 1.2, 55.0    |
| 30   | 44             | 0.04      | 0.02, 0.12 | 42                            | 0.03      | 0.01, 0.12 | 74                         | 0.02      | 0.00, 0.17  | 53            | 8.0       | 2.6, 23.9    |
| 31   | 54             | 0.02      | 0.01, 0.05 | 71                            | 0.03      | 0.01, 0.15 |                            |           |             | 70            | 7.7       | 1.4, 42.4    |
| 32   | 74             | 0.02      | 0.00, 0.08 | 81                            | 0.03      | 0.01, 0.09 |                            |           |             | 62            | 7.4       | 1.9, 29.5    |
| 33   |                |           |            |                               |           |            |                            |           |             | 81            | 6.6       | 1.7, 25.3    |

\*Analyses using a fixed-effect model [27]. †Analyses using DerSimonian and Laird's random-effects model [20] with a continuity correction (CC) = 0.25. ‡Analyses using DerSimonian and Laird's random-effects model [20] with CC = 0. HPV-62 and -69 ORs could not be calculated. §Analyses using DerSimonian and Laird's random-effects model [20] (CC = 0.5), with HPV-negative subjects as the reference group. In this model, unlike the preceding ones, the pooled OR for HPV-16 could be estimated. Abbreviations: HPV, human papilloma virus; OR, odds ratio; CI, confidence interval.
